# Supplementary material for: Uncertainties in tropical cyclone landfall decay
Source: Springer Nature journal article supplement (doi:10.1038/s41612-022-00320-z), 2022-11-17
Supplement: 41612_2022_320_MOESM1_ESM.pdf [file 41612_2022_320_MOESM1_ESM.pdf]

# **Supplementary Information for Uncertainties in tropical cyclone landfall decay**

Kelvin T. F. CHAN<sup>1,2,3\*</sup>, Johnny C. L. CHAN<sup>4,5,6</sup>, Kailin ZHANG<sup>1</sup>, and Yue WU<sup>1</sup>

<sup>1</sup>School of Atmospheric Sciences, Sun Yat-sen University, and Southern Marine Science and Engineering Guangdong Laboratory (Zhuhai), Zhuhai, China

<sup>2</sup>Guangdong Province Key Laboratory for Climate Change and Natural Disaster Studies, Sun Yat-sen University, Zhuhai, China

<sup>3</sup>Key Laboratory of Tropical Atmosphere-Ocean System (Sun Yat-sen University), Ministry of Education, Zhuhai, China

<sup>4</sup>School of Energy and Environment, City University of Hong Kong, Hong Kong, China

<sup>5</sup>Shanghai Typhoon Institute, China Meteorological Administration, Shanghai, China

<sup>6</sup>Asia-Pacific Typhoon Collaborative Research Center, Shanghai, China

\*Corresponding Author: Kelvin T. F. CHAN (chenth25@mail.sysu.edu.cn)

Including:

Supplementary Table 1

Supplementary Figure 1

**Supplementary Table 1 | Best-track data and corresponding availability in individual basins.**

| Basin                 | Best-track data | Data availability    |
|-----------------------|-----------------|----------------------|
| North Atlantic        | HURDAT2         | 1851–2020            |
| Eastern North Pacific | HURDAT2         | 1876–2020            |
| Western North Pacific | CMA, JTWC       | 1950–2019, 1945–2019 |
| North Indian Ocean    | JTWC            | 1945–2019            |
| South Pacific         | JTWC            | 1945–2018            |
| South Indian Ocean    | JTWC            | 1945–2018            |

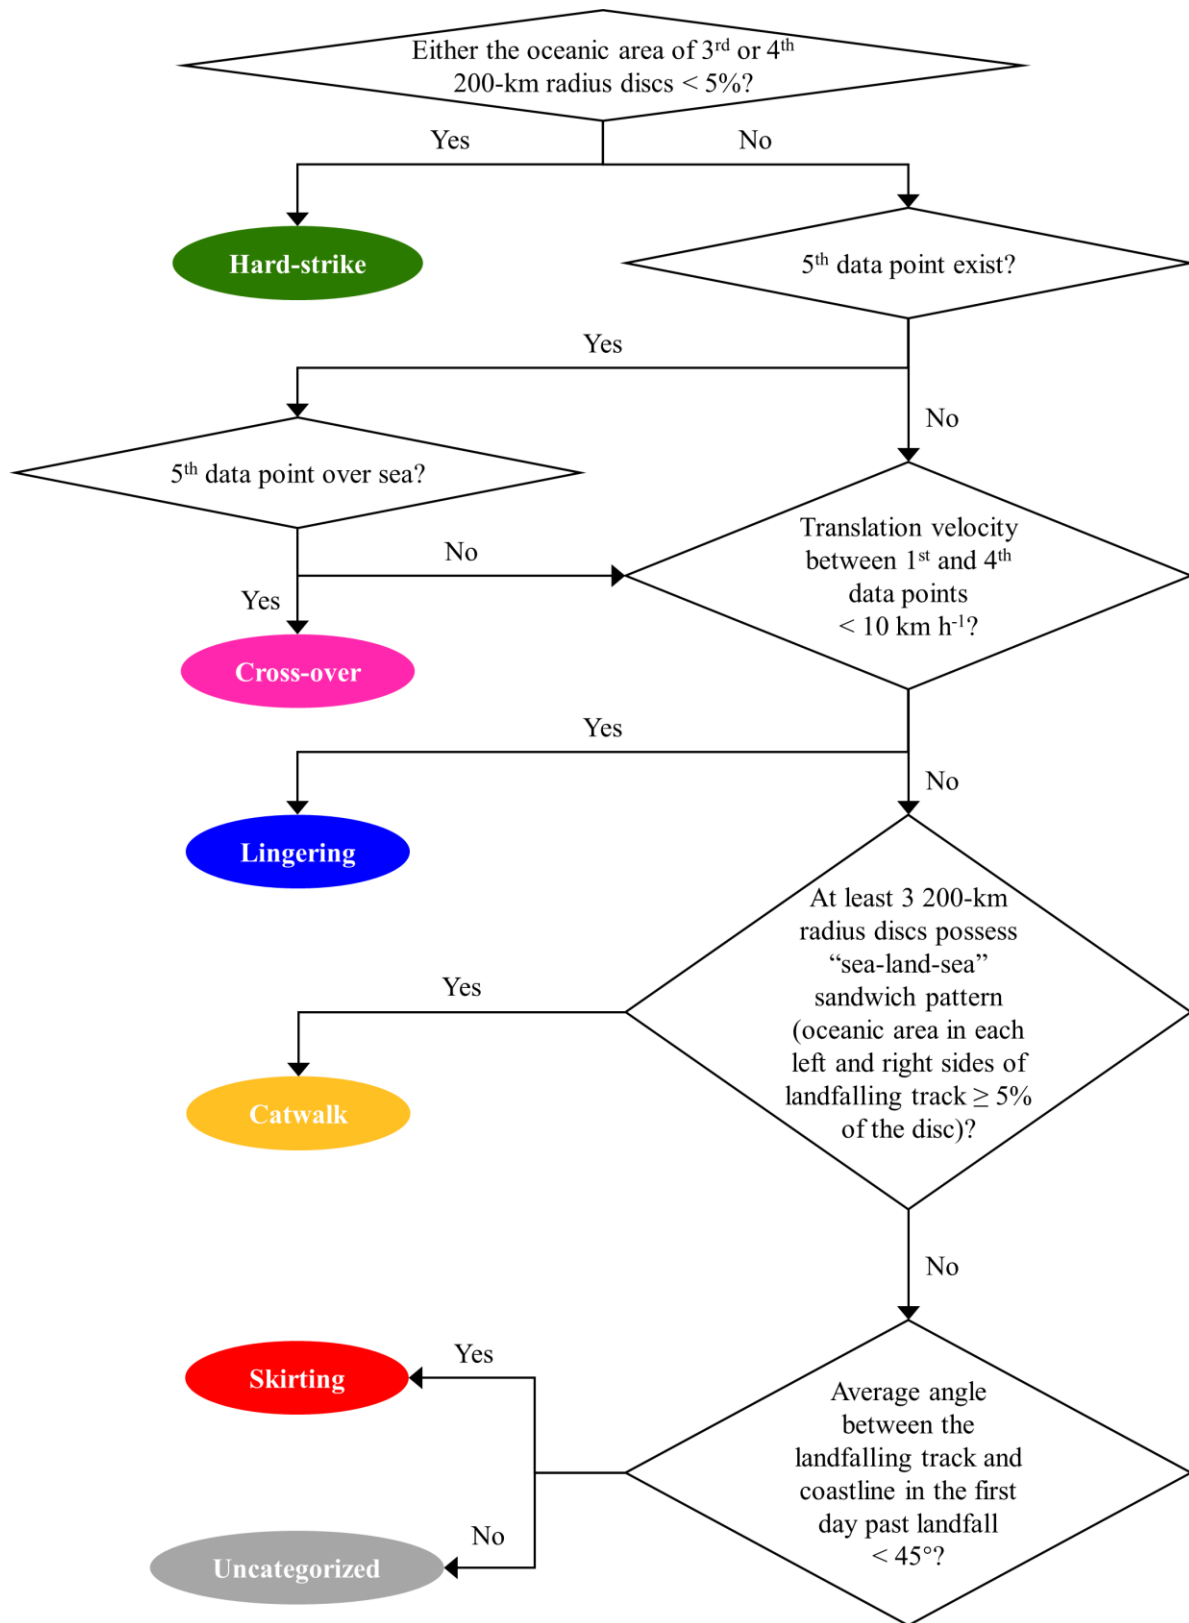

**Supplementary Figure 1 | Categorization of landfalling track modes.** An updated decision tree of that in CZ<sup>12</sup> (with slight modification on the Catwalk mode).
